# Supplementary material for: Artificial neural network models to predict nodal status in clinically node-negative breast cancer
Source: Springer Nature journal article supplement (doi:10.1186/s12885-019-5827-6), 2019-06-21
Supplement: MOESM1 [file 16842506]

**Sensitivity Analysis N0 vs.N+**

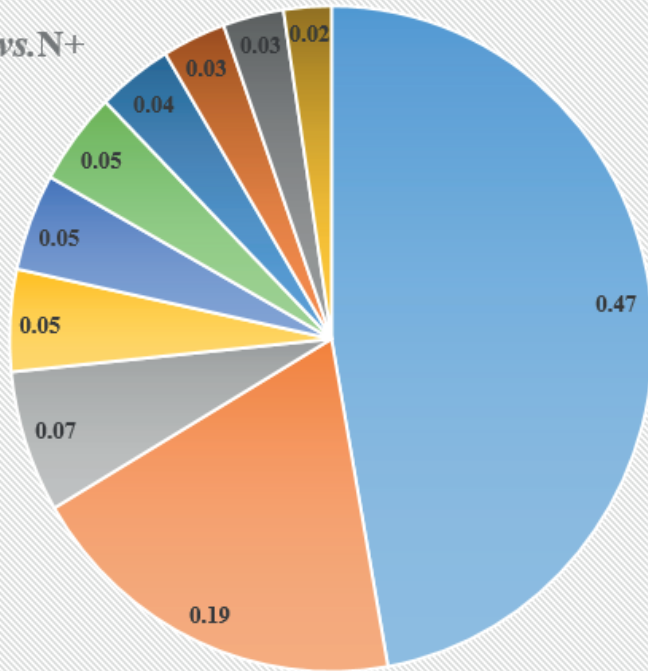

- Tumor size
- Vascular invasion
- Multifocality
- ER status
- Histological type
- PR status
- Mode of detection
- Age
- Tumor localization
- Ki67

**Sensitivity Analysis N1 vs. N0**

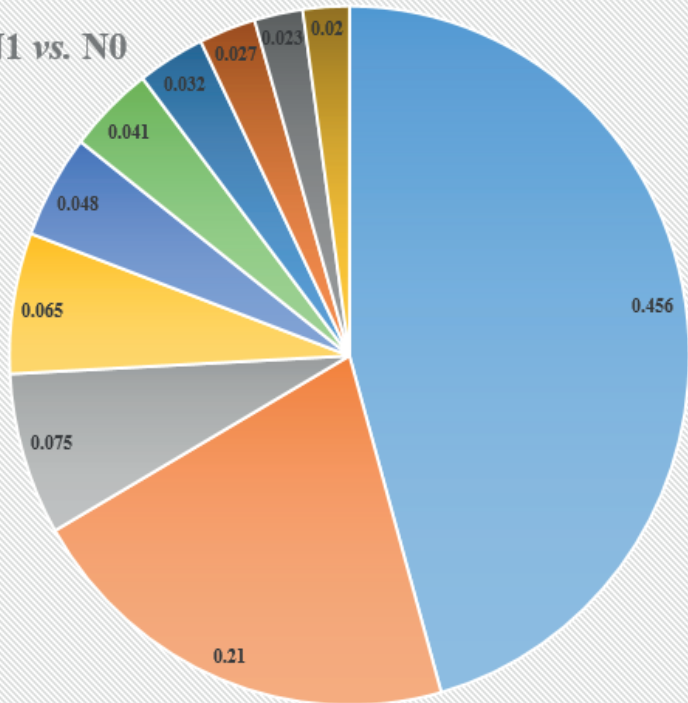

- Tumor size
- Vascular invasion
- Multifocality
- PR status
- Histological type
- ER status
- Age
- Tumor localization
- Ki67
- Menopausal status

**Sensitivity Analysis N2 vs. N0 and N1**

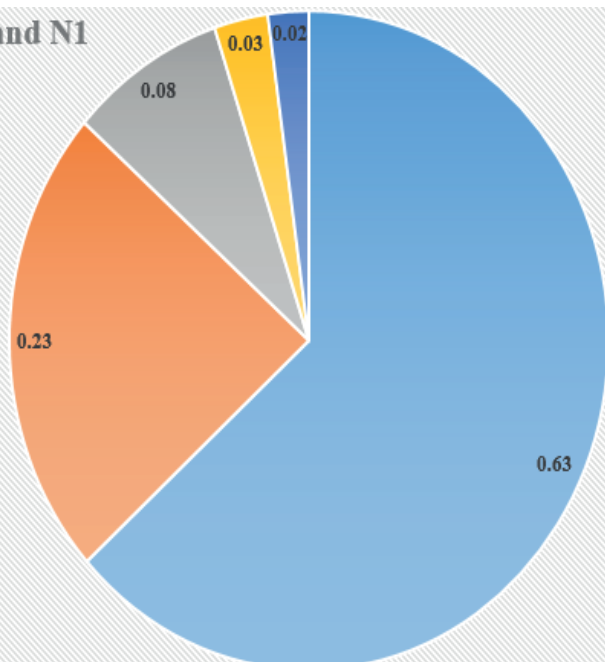

- Tumor size
- Vascular invasion
- ER status
- Histological type
- Tumor localization
